# Supplementary material for: Gibberellin Application at Pre-Bloom in Grapevines Down-Regulates the Expressions of VvIAA9 and VvARF7, Negative Regulators of Fruit Set Initiation, during Parthenocarpic Fruit Development
Source: PubMed Central journal article supplement (PMC3990702; doi:10.1371/journal.pone.0095634), 2014-04-17

A

## FAD binding site

```

                *           20           *           40           *           60           *           80           *           100           *
AtYUCCA2 : ME--EVTETLGRRIHDE-----YVEETRCIMYEGPIIIVGSGPSGLATAAACLKSRDTPSLILERSCTASLWQHKTYPDRLRHLHPKDFCELPMPFFSSYPYPTKQOFV : 102
AtYUCCA6 : MDFCKKREMEGKLAHD----HRGMTSPRRICVWPGPIVVGAGPSGLATAAACLKSRGITSVLLERSNCTASLWQLKTYDRLRHLHPKQFCLELPPIPFPCDFPTYPTKQOFI : 106
ToFZY2 : MDSYLK-ELQGKTSHDYFNHNNKMINRCVFNWGPVIVGAGPSGLAAACLTSKGVQSLVLRBNCIASLWQLKTYDRLRHLHPKQFCLELPMPFFPHDFPTYPTKQOFI : 109
VvYUCCA2 : MD--MLKEVEGKRVHDE--LGRKMSKSERRIIVGPIVIVGAGPSGLAVAAACLKERTISSLILERSNCTASLWNLKTYDRLRHLHPKDFCELPMPFFPDPFRYPTKHQFL : 106
VvYUCCA6 : MD--BLRELEGKRAHDEIFNDKAMSCGR--SLIILGPIVIVGAGPSGLATAAACLKRVSVILERSNRITASLWQLNTPYDRLRHLHPKQFCLELPMPFFBNDFPTYPTKQOFI : 106

```

## NADPH binding site

```

                120           *           140           *           160           *           180           *           200           *           220
AtYUCCA2 : QYLESYAEHFDLKRFVFNQTVEEAKEDRRCCGLWRVVRTGGKKDEITMSYVSRMLVVAATGENABEVMPEIDGIPDFGCP--IHTSSYKSGEIESEKKILVVVCGNSGMEVCL : 210
AtYUCCA6 : EYLEDYARRFDIKRBFNQTVESAAFDENLCMWRVTSVGE--EGTTPYVCRMLVVAATGENABPVVRFEGCWDKFAAAGVVKHTCHYKTCGDRAGKRVLVVCGNSGMEVCL : 214
ToFZY2 : KYLESYALTENIRDFNQTVVSACVDRNLGLWRIRTDIT--TSSTREVTREMLIVATGENABAVVDEDEGMEBEDCS--IHHTSLYKSGEIEPKRKKVVLVCGNSGMEVCL : 215
VvYUCCA2 : NYLBAYAKRFDIRBFNKTVVSABEDPRSRIWQVKTTRGFKKEEIVYQCWLIIVATGENABEVMPEIQGMNFAFCP--IHTSSYKSGDSYRGRKRVLVVCGNSGMEVCL : 214
VvYUCCA6 : EYLBAYABREDIQRENEFSVARABYDHTLEFWRVKTET-----TEYLCRMLVVAARGENABAVVPEIEGRKKEGCP--IVHTSSYKSGDVMYRGRKRVLVVCGNSGMEVCL : 208

```

```

                *           240           *           260           *           280           *           300           *           320           *
AtYUCCA2 : DLCNPNAPESLAVRDSVHVLEPQEMLGRSTFGISTSLKWFPEVHVVDRELLRMSRLVLDGTDRLGLRPRPLGPLERKKIKCGKTPVLDVGTLAKIRSGHIKVVYBELKR-VMH : 319
AtYUCCA6 : DLCNFGAQPESLAVRDAVHVLPREMLGRSTFGLSMFLKMLPIRLVDRLLVSRFLLGDTTLUGLNRPALGPLELKNLSGKTPVLDVGTLAKIKTGDIKVCSSGIRR-LKR : 323
ToFZY2 : DLCNHHAPESLAVRDTVHVLPREMLGRSTFGLSMFLKMLPMLRVDRLELLITSRILLGDTSRILGLDRPEITGLELKNLSGKTPVLDVGTLAKIKSGDIKVCPSGIKRLKH : 325
VvYUCCA2 : DLCNHNAPESLAVRDSVHVLEPQEMLGRSTFGLSMFLKWFPEVRLVDQELLLVSRMLLDGTARIGLRPRPLGPLQLKSLSGKTPVLDVGTLAKIKTGNIKVGRIKQ-LSC : 323
VvYUCCA6 : DLCNHNAPESLAVRDSVHILPRQMLGRSTFGLSMFLKMLPMLRVLDHLLLVSRFMLGDTARIGLRPRPALGPLELKNLSGKTPVLDVGTLAKIKSGDIKICPPIRQ-LKC : 317

```

```

                340           *           360           *           380           *           400           *           420
AtYUCCA2 : YSABEYVDCRVDFDAIILATGYKSNVPMWLKGVNMFSEKDGEPHKRFPNGWKGESGLYAVGFTKRLGLLGAATDAKKIABDIEVQRHFLPLARPOHC--- : 415
AtYUCCA6 : EYVEFDNGKTERFDAIILATGYKSNVPSWLKKNKMFSEKDGEPHQBFEPGWRGEGCLYAVGFTKRGLISGASMDAKRIABDIHKCKQDEQVKKI----- : 417
ToFZY2 : HTEVFVNGQTEBYDAIILATGYKSNVPSWLKKEKMFSEKDGELPKRFPNGWKGEGCLYAVGFTKRGLLIGASIDAKKIABDIIHQYEQ----- : 411
VvYUCCA2 : HTEVFVDCRVDFDAIILATGYKSNVPSWLKGVNMFSEKDGELPKRFPNGWKGEGCLYAVGFTKRGLLIGASLDARRIABEELSVHSWPFQHFHRDNDHL : 422
VvYUCCA6 : HAVVEYVDCRVDFDAIILATGYKSNVPSWLKERDLESEKDGELPKRFPNGWKGEGCLYAVGFTKRGLLIGASMDAKRIABDIEBRCWKADAKRLTVKSHT- : 415

```

B

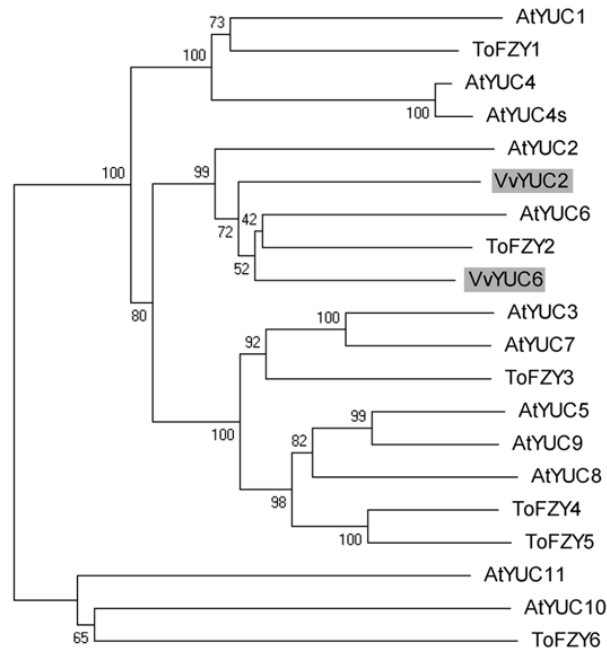

Supplement: pone.0095634.s003.pdf [file pone.0095634.s003.pdf]
