# Supplementary material for: Gibberellin Application at Pre-Bloom in Grapevines Down-Regulates the Expressions of VvIAA9 and VvARF7, Negative Regulators of Fruit Set Initiation, during Parthenocarpic Fruit Development
Source: PubMed Central journal article supplement (PMC3990702; doi:10.1371/journal.pone.0095634), 2014-04-17
Supplement: pone.0095634.s004.pdf [file pone.0095634.s004.pdf]

**A**

DELLA TVHYNP

AtGAI : MKRDHHHHHHQ-----DKKTMMNNEE---DDGN---GMDELLAVLGYKVRSS<sup>\*</sup>EMADVAQKLEQLEVMMSNVQEDDLSQ<sup>\*</sup>LATE<sup>\*</sup>ETVHYNPAELYT<sup>\*</sup> : 83  
SlDELLA : MKRDRDRDREREKRAF<sup>\*</sup>SNCAVSSGKSKI<sup>\*</sup>WEE---DEE<sup>\*</sup>EKPDAGMDELLAVLGYKVKSSDMADVAQKLEQLEMAMGT<sup>\*</sup>TMEDGITHLS<sup>\*</sup>TD<sup>\*</sup>TVHKNP<sup>\*</sup>SDMAGW : 97  
VvDELLA : MKRDLLDGC<sup>\*</sup>GGGGGGGGGG<sup>\*</sup>GKEEGSSSMVSAK<sup>\*</sup>GKMWDDGQQDAGMDELLAVLGY<sup>\*</sup>NVRSSDMVDVAQKLEQLEVMVGNACEDG<sup>\*</sup>ISHLSS<sup>\*</sup>GT<sup>\*</sup>TVHYNP<sup>\*</sup>SDLSGW : 101

Poly S/T/N

AtGAI : L<sup>\*</sup>DSMLT<sup>\*</sup>DLNPPSSNAEYDLKAI<sup>\*</sup>P-GDA<sup>\*</sup>ILN-----QFAID<sup>\*</sup>SASS<sup>\*</sup>NOG-----GGD<sup>\*</sup>TYT<sup>\*</sup>--NKRLK<sup>\*</sup>CNSNGV<sup>\*</sup>VETT : 147  
SlDELLA : VQSM<sup>\*</sup>LSST<sup>\*</sup>STN<sup>\*</sup>FDMCNQENDV<sup>\*</sup>LVS<sup>\*</sup>CGGSSS-----SI<sup>\*</sup>IDF<sup>\*</sup>SNHR<sup>\*</sup>ST<sup>\*</sup>ISDD-----DL<sup>\*</sup>RAIP<sup>\*</sup>CGAVENS<sup>\*</sup>SDSNKR<sup>\*</sup>RHRST<sup>\*</sup>SS<sup>\*</sup>FSTT : 173  
VvDELLA : VQSM<sup>\*</sup>LTE<sup>\*</sup>LNPPSSAFASS<sup>\*</sup>QQT<sup>\*</sup>FID<sup>\*</sup>DPL<sup>\*</sup>LAPSES<sup>\*</sup>STI<sup>\*</sup>TIL<sup>\*</sup>DFSGSRQ<sup>\*</sup>SEH<sup>\*</sup>SRIYNDNSDY<sup>\*</sup>DL<sup>\*</sup>SAIP<sup>\*</sup>GVAVYRR<sup>\*</sup>PDQ<sup>\*</sup>QDGEKS--SK<sup>\*</sup>RKMT<sup>\*</sup>ASSSS<sup>\*</sup>SSS : 200

LHR I NLS

AtGAI : T-----AT<sup>\*</sup>AESTRH<sup>\*</sup>VVLVDSQ<sup>\*</sup>ENGVRLV<sup>\*</sup>HALLACABA<sup>\*</sup>VQKENL<sup>\*</sup>TVAEALV<sup>\*</sup>RQIGFLAVS<sup>\*</sup>QIGAMR<sup>\*</sup>KVATYFABALARRI<sup>\*</sup>YRIS<sup>\*</sup>PSQS<sup>\*</sup>PIDH<sup>\*</sup>SLSD<sup>\*</sup>TL : 239  
SlDELLA : S-----SS<sup>\*</sup>MV<sup>\*</sup>TDSSAT<sup>\*</sup>RFVVLVDSQ<sup>\*</sup>ETGVRLV<sup>\*</sup>H<sup>\*</sup>LMACABA<sup>\*</sup>VQENL<sup>\*</sup>TLADQ<sup>\*</sup>LVRHIGILAVS<sup>\*</sup>QSGAMR<sup>\*</sup>KVATYFABALARRI<sup>\*</sup>YKI<sup>\*</sup>YF-QDS<sup>\*</sup>MESSY<sup>\*</sup>TDV<sup>\*</sup>L : 268  
VvDELLA : TQ<sup>\*</sup>VQENGLAS<sup>\*</sup>VAE<sup>\*</sup>STR<sup>\*</sup>FVVV<sup>\*</sup>VDSQ<sup>\*</sup>ETGVRLV<sup>\*</sup>H<sup>\*</sup>LMACAD<sup>\*</sup>AVQ<sup>\*</sup>QDNM<sup>\*</sup>KLADALV<sup>\*</sup>KHIGIL<sup>\*</sup>LAASQ<sup>\*</sup>AGAMR<sup>\*</sup>KVATYFABALARRI<sup>\*</sup>YRI<sup>\*</sup>YF-QDS<sup>\*</sup>LESSY<sup>\*</sup>SDI<sup>\*</sup>L : 300

VHIID LHR II

AtGAI : QM<sup>\*</sup>HFEY<sup>\*</sup>TC<sup>\*</sup>PYL<sup>\*</sup>KFAH<sup>\*</sup>FTANQA<sup>\*</sup>ILEAF<sup>\*</sup>Q<sup>\*</sup>GK<sup>\*</sup>KRVH<sup>\*</sup>VIDF<sup>\*</sup>SMS<sup>\*</sup>QGLQ<sup>\*</sup>WPALM<sup>\*</sup>QALALR<sup>\*</sup>PGG<sup>\*</sup>PPV<sup>\*</sup>FRL<sup>\*</sup>TGIG<sup>\*</sup>PPA<sup>\*</sup>PDNE<sup>\*</sup>DYL<sup>\*</sup>HEV<sup>\*</sup>GC<sup>\*</sup>KL<sup>\*</sup>AHL<sup>\*</sup>AE<sup>\*</sup>ATH<sup>\*</sup>VEFEY<sup>\*</sup>RGF : 340  
SlDELLA : QM<sup>\*</sup>HFEY<sup>\*</sup>TC<sup>\*</sup>PYL<sup>\*</sup>KFAH<sup>\*</sup>FTANQA<sup>\*</sup>ILEAF<sup>\*</sup>T<sup>\*</sup>GC<sup>\*</sup>NKVH<sup>\*</sup>VIDF<sup>\*</sup>SL<sup>\*</sup>KQGM<sup>\*</sup>QWPALM<sup>\*</sup>QALALR<sup>\*</sup>PGG<sup>\*</sup>PPA<sup>\*</sup>FRL<sup>\*</sup>TGIG<sup>\*</sup>PP<sup>\*</sup>PDNT<sup>\*</sup>DAL<sup>\*</sup>QQV<sup>\*</sup>GW<sup>\*</sup>KL<sup>\*</sup>AQL<sup>\*</sup>AE<sup>\*</sup>TIG<sup>\*</sup>VEFE<sup>\*</sup>FRGF : 369  
VvDELLA : QM<sup>\*</sup>HFEY<sup>\*</sup>AC<sup>\*</sup>PYL<sup>\*</sup>KFAH<sup>\*</sup>FTANQA<sup>\*</sup>ILEAF<sup>\*</sup>AG<sup>\*</sup>AN<sup>\*</sup>RVH<sup>\*</sup>VIDF<sup>\*</sup>GL<sup>\*</sup>KQGM<sup>\*</sup>QWPALM<sup>\*</sup>QALALR<sup>\*</sup>PGG<sup>\*</sup>PPS<sup>\*</sup>FRL<sup>\*</sup>TGIG<sup>\*</sup>PP<sup>\*</sup>PDNT<sup>\*</sup>DAL<sup>\*</sup>QQV<sup>\*</sup>GW<sup>\*</sup>KL<sup>\*</sup>AQL<sup>\*</sup>AE<sup>\*</sup>TIG<sup>\*</sup>VEFE<sup>\*</sup>FRGF : 401

PFYRE

AtGAI : VANTLAD<sup>\*</sup>LDAS<sup>\*</sup>MLE<sup>\*</sup>LRP<sup>\*</sup>SEIE<sup>\*</sup>SVAVNS<sup>\*</sup>VFEL<sup>\*</sup>HKLL<sup>\*</sup>GRPGA<sup>\*</sup>IDK<sup>\*</sup>VLG<sup>\*</sup>VN<sup>\*</sup>QIK<sup>\*</sup>PEIF<sup>\*</sup>TVVEQ<sup>\*</sup>ESNH<sup>\*</sup>NSPI<sup>\*</sup>FLDR<sup>\*</sup>FTE<sup>\*</sup>SL<sup>\*</sup>HYY<sup>\*</sup>ST<sup>\*</sup>LE<sup>\*</sup>DSLE<sup>\*</sup>GV----PSG<sup>\*</sup>QDK : 437  
SlDELLA : VANSLAD<sup>\*</sup>LDAT<sup>\*</sup>ILDIR<sup>\*</sup>PSE<sup>\*</sup>TEAVAIN<sup>\*</sup>SVFEL<sup>\*</sup>HRL<sup>\*</sup>LSR<sup>\*</sup>PGA<sup>\*</sup>IEK<sup>\*</sup>VLNS<sup>\*</sup>IKO<sup>\*</sup>IN<sup>\*</sup>PKI<sup>\*</sup>VTL<sup>\*</sup>VEQ<sup>\*</sup>EAN<sup>\*</sup>HNAG<sup>\*</sup>VFID<sup>\*</sup>RFNE<sup>\*</sup>AL<sup>\*</sup>HYY----- : 450  
VvDELLA : VANSLAD<sup>\*</sup>LEP<sup>\*</sup>SML<sup>\*</sup>OIR<sup>\*</sup>PPE<sup>\*</sup>VEAVAVNS<sup>\*</sup>VLE<sup>\*</sup>LHRL<sup>\*</sup>LAR<sup>\*</sup>PGA<sup>\*</sup>IEK<sup>\*</sup>VLSS<sup>\*</sup>IKAM<sup>\*</sup>KPKI<sup>\*</sup>VTV<sup>\*</sup>VEQ<sup>\*</sup>EASH<sup>\*</sup>NG<sup>\*</sup>PV<sup>\*</sup>FLDR<sup>\*</sup>FTEAL<sup>\*</sup>HYY<sup>\*</sup>SN<sup>\*</sup>LE<sup>\*</sup>DSLE<sup>\*</sup>GC<sup>\*</sup>GVSP<sup>\*</sup>SS<sup>\*</sup>QDL : 502

SAW

AtGAI : VMSEV<sup>\*</sup>YL<sup>\*</sup>GK<sup>\*</sup>QIC<sup>\*</sup>NV<sup>\*</sup>VAC<sup>\*</sup>DG<sup>\*</sup>PD<sup>\*</sup>RVER<sup>\*</sup>HETLS<sup>\*</sup>QWR<sup>\*</sup>NRE<sup>\*</sup>GS<sup>\*</sup>AGE<sup>\*</sup>AAAH<sup>\*</sup>IGS<sup>\*</sup>NAF<sup>\*</sup>KQAS<sup>\*</sup>MLL<sup>\*</sup>ALF<sup>\*</sup>NGG<sup>\*</sup>EGY<sup>\*</sup>RVEES<sup>\*</sup>DG<sup>\*</sup>CLML<sup>\*</sup>GW<sup>\*</sup>HTR<sup>\*</sup>PLI<sup>\*</sup>ATSA<sup>\*</sup>WKL<sup>\*</sup>SN----- : 533  
SlDELLA : -----ETL<sup>\*</sup>NQ<sup>\*</sup>WR<sup>\*</sup>VR<sup>\*</sup>MS<sup>\*</sup>SS<sup>\*</sup>GF<sup>\*</sup>DP<sup>\*</sup>VHL<sup>\*</sup>GS<sup>\*</sup>NAF<sup>\*</sup>KQAS<sup>\*</sup>MLL<sup>\*</sup>ALF<sup>\*</sup>AGG<sup>\*</sup>DGY<sup>\*</sup>RVEEND<sup>\*</sup>DG<sup>\*</sup>CLML<sup>\*</sup>GW<sup>\*</sup>HTR<sup>\*</sup>PLI<sup>\*</sup>ATSA<sup>\*</sup>WKL<sup>\*</sup>LPD<sup>\*</sup>SGTGA : 525  
VvDELLA : MMSEI<sup>\*</sup>YL<sup>\*</sup>GR<sup>\*</sup>QIC<sup>\*</sup>NV<sup>\*</sup>VACE<sup>\*</sup>GA<sup>\*</sup>ER<sup>\*</sup>VER<sup>\*</sup>HETLS<sup>\*</sup>QWR<sup>\*</sup>SR<sup>\*</sup>MG<sup>\*</sup>SAG<sup>\*</sup>FD<sup>\*</sup>PVHL<sup>\*</sup>GS<sup>\*</sup>NAF<sup>\*</sup>KQAS<sup>\*</sup>MLL<sup>\*</sup>ALF<sup>\*</sup>AGG<sup>\*</sup>DGY<sup>\*</sup>RVEENN<sup>\*</sup>DG<sup>\*</sup>CLML<sup>\*</sup>GW<sup>\*</sup>HTR<sup>\*</sup>PLI<sup>\*</sup>ATSA<sup>\*</sup>WQL<sup>\*</sup>NS<sup>\*</sup>NP<sup>\*</sup>NPTS : 603

AtGAI : ----- : -  
SlDELLA : GEVEL----- : 530  
VvDELLA : TSASTSAHSQ : 613

**B**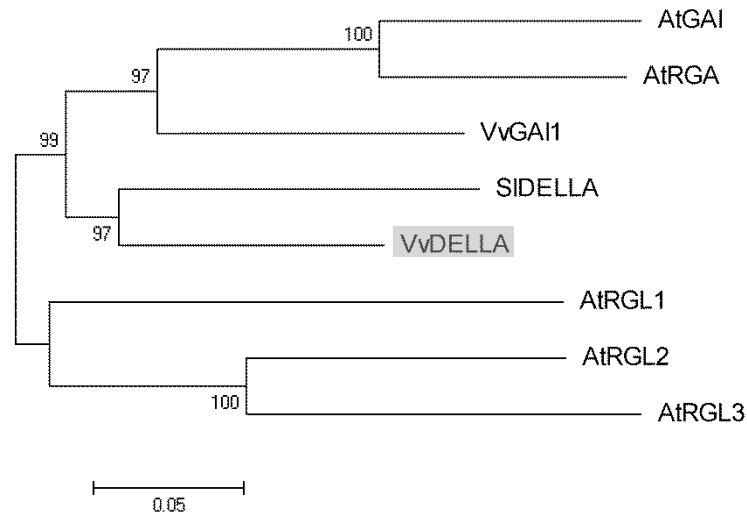**C**

|           |      |      |      |        |      |        |     |       |        |      |       |         |      |      |        |      |      |     |      |      |      |        |     |      |      |      |     |      |      |      |      |      |
|-----------|------|------|------|--------|------|--------|-----|-------|--------|------|-------|---------|------|------|--------|------|------|-----|------|------|------|--------|-----|------|------|------|-----|------|------|------|------|------|
|           | 0    | *    | 140  | *      | 160  | *      | 180 | *     | 200    | *    | 220   |         |      |      |        |      |      |     |      |      |      |        |     |      |      |      |     |      |      |      |      |      |
| SIDElla : | MCNQ | ---  | ENDV | LVSGCG | SSSS | IIIDFS | --- | QNHRT | STISDD | ---  | DLRAI | PGGAVFN | ---  | SDSN | KRHRST | TSSE | STTS | --- | SSMV | TDSS | ATRP | VVLVDS |     |      |      |      |     |      |      |      |      |      |
| VvDELLA : | SSSQ | QTPI | DDP  | LLAP   | SESS | STIT   | ITL | DFSG  | SRQ    | QSEH | QSRI  | YND     | NSDY | DL   | SAI    | PGV  | AVY  | RRP | DQ   | GD   | GK   | SS     | KRM | KTAS | SSSS | SSST | QVQ | ENGL | ASVA | ESTR | PVVV | VVDS |

**D**

|          |     |     |       |     |      |      |       |       |       |      |      |       |      |      |      |     |     |      |     |      |     |     |        |     |     |      |     |     |    |      |         |    |     |     |      |      |
|----------|-----|-----|-------|-----|------|------|-------|-------|-------|------|------|-------|------|------|------|-----|-----|------|-----|------|-----|-----|--------|-----|-----|------|-----|-----|----|------|---------|----|-----|-----|------|------|
|          | 120 | *   | 140   | *   | 160  | *    | 180   | *     | 200   | *    | 220  |       |      |      |      |     |     |      |     |      |     |     |        |     |     |      |     |     |    |      |         |    |     |     |      |      |
| AtGAI :  | SSN | --- | AEYDL | KAI | PGDA | ILNQ | FAIDS | ASSSN | QG    | ---  | GGGD | TYTT  | TKRL | KCS  | NG   | --- | VVE | TTT  | A   | AE   | STR | H   | VVLVDS |     |     |      |     |     |    |      |         |    |     |     |      |      |
| AtRGA :  | SSN | GLD | PVLP  | --- | SPEI | CGF  | EASDY | DLKVI | PGNAI | YQFP | AIDS | SSSSN | NQ   | NKRL | KSC  | SSP | DSM | VT   | ST  | ST   | GT  | QI  | GG     | VIG | TTV | TTTT | TTT | A   | AG | ESTR | SVILVDS |    |     |     |      |      |
| VvGAI1 : | LDN | PFL | PPI   | S   | PLDY | TNC  | STQ   | PKQE  | PSI   | FDS  | SLDY | DLKAI | PG   | RALY | SHIE | QPP | QPP | PAPP | --- | LYQR | DN  | KRL | KPT    | TS  | AT  | ANS  | --- | VSS | VI | GG   | W       | GV | PTE | SAR | PVVV | VVDS |
